# Supplementary material for: Astrocyte Store-Released Calcium Modulates Visual Cortex Synapse Development and Circuit Function
Source: Research Square preprint supplement (doi:10.21203/rs.3.rs-7890067/v1), 2025-11-17
Supplement: Supplementary file 1 [file 9b2425a8a325572d9a3614d0.pdf]

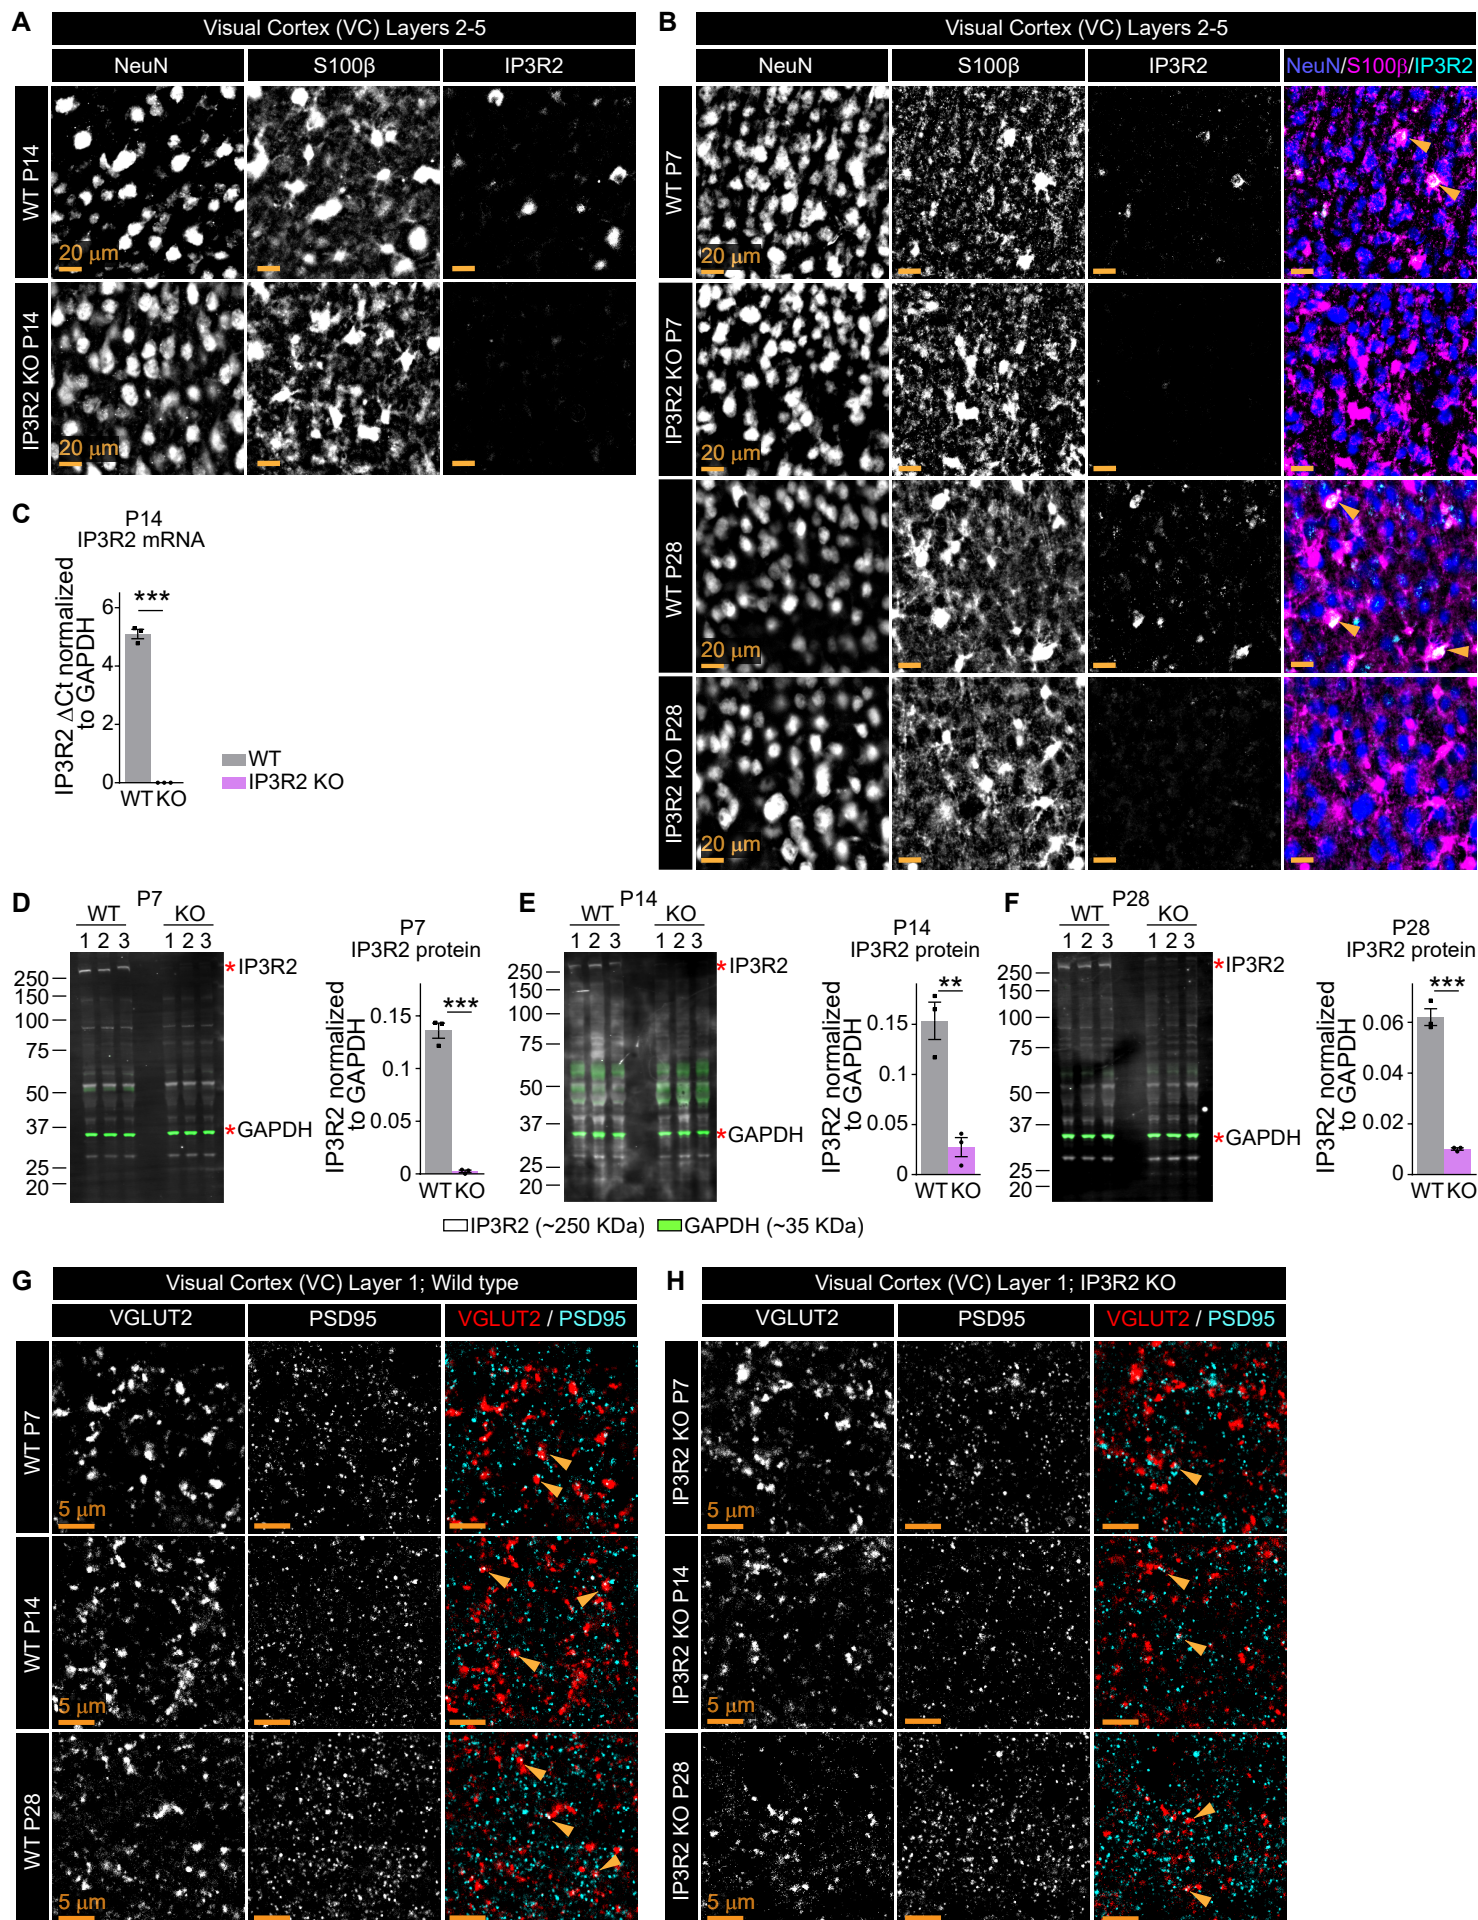

Figure S1

**Figure S1. Glutamatergic synapse development is perturbed in IP3R2 KO mice VC, related to Figure 1.** See also Table S1. **A.** Example single channel grayscale images of P14 VC in WT and KO mice as labeled showing Neun, S100 $\beta$ , and IP3R2 signal (merged image is shown in Fig. 1B). **B.** Example images of Neun, S100 $\beta$  and IP3R2 in WT and KO VC at P7 and P28 as labeled. Single channel grayscale images are on the left, merged images on the right. **C.** Quantification of qPCR represented as change in IP3R2 Ct ( $\Delta$ CT) relative to GAPDH. IP3R2 mRNA was not detectable in IP3R2 KO mice. **D-F.** Uncropped Western Blot images showing IP3R2 signal (white; imaged at 700 channel; see Methods) and GAPDH signal (green imaged at 800 channel) for each age and genotype as labeled. Numbers above each lane indicate individual mouse samples. For each blot, quantification is shown on the right, represented as IP3R2 signal normalized to GAPDH loading control for each age and genotype as labeled. IP3R2 signal is strongly reduced in IP3R2 KO mice at all developmental stages. **G-H.** Example images of the presynaptic VGLUT2, postsynaptic PSD95 and merged (synapses) in each age and genotype as labeled. Single channel grayscale images on the left, merged images on the right. Graphs show mean  $\pm$  s.e.m. Individual mouse data points are shown as circles. Number of mice/group (N) N=3 in A-F; N=5 in G-H. Scale bar = 20  $\mu$ m in A-B; 5  $\mu$ m in G-H. Arrowheads mark representative IP3R2 signal colocalized with astrocyte marker S100 $\beta$  in B, and colocalized puncta in G-H. \*\*P<0.01; \*\*\*P<0.001 comparing WT and KO groups by t-test. ns denotes non-significant (P>0.05) results.

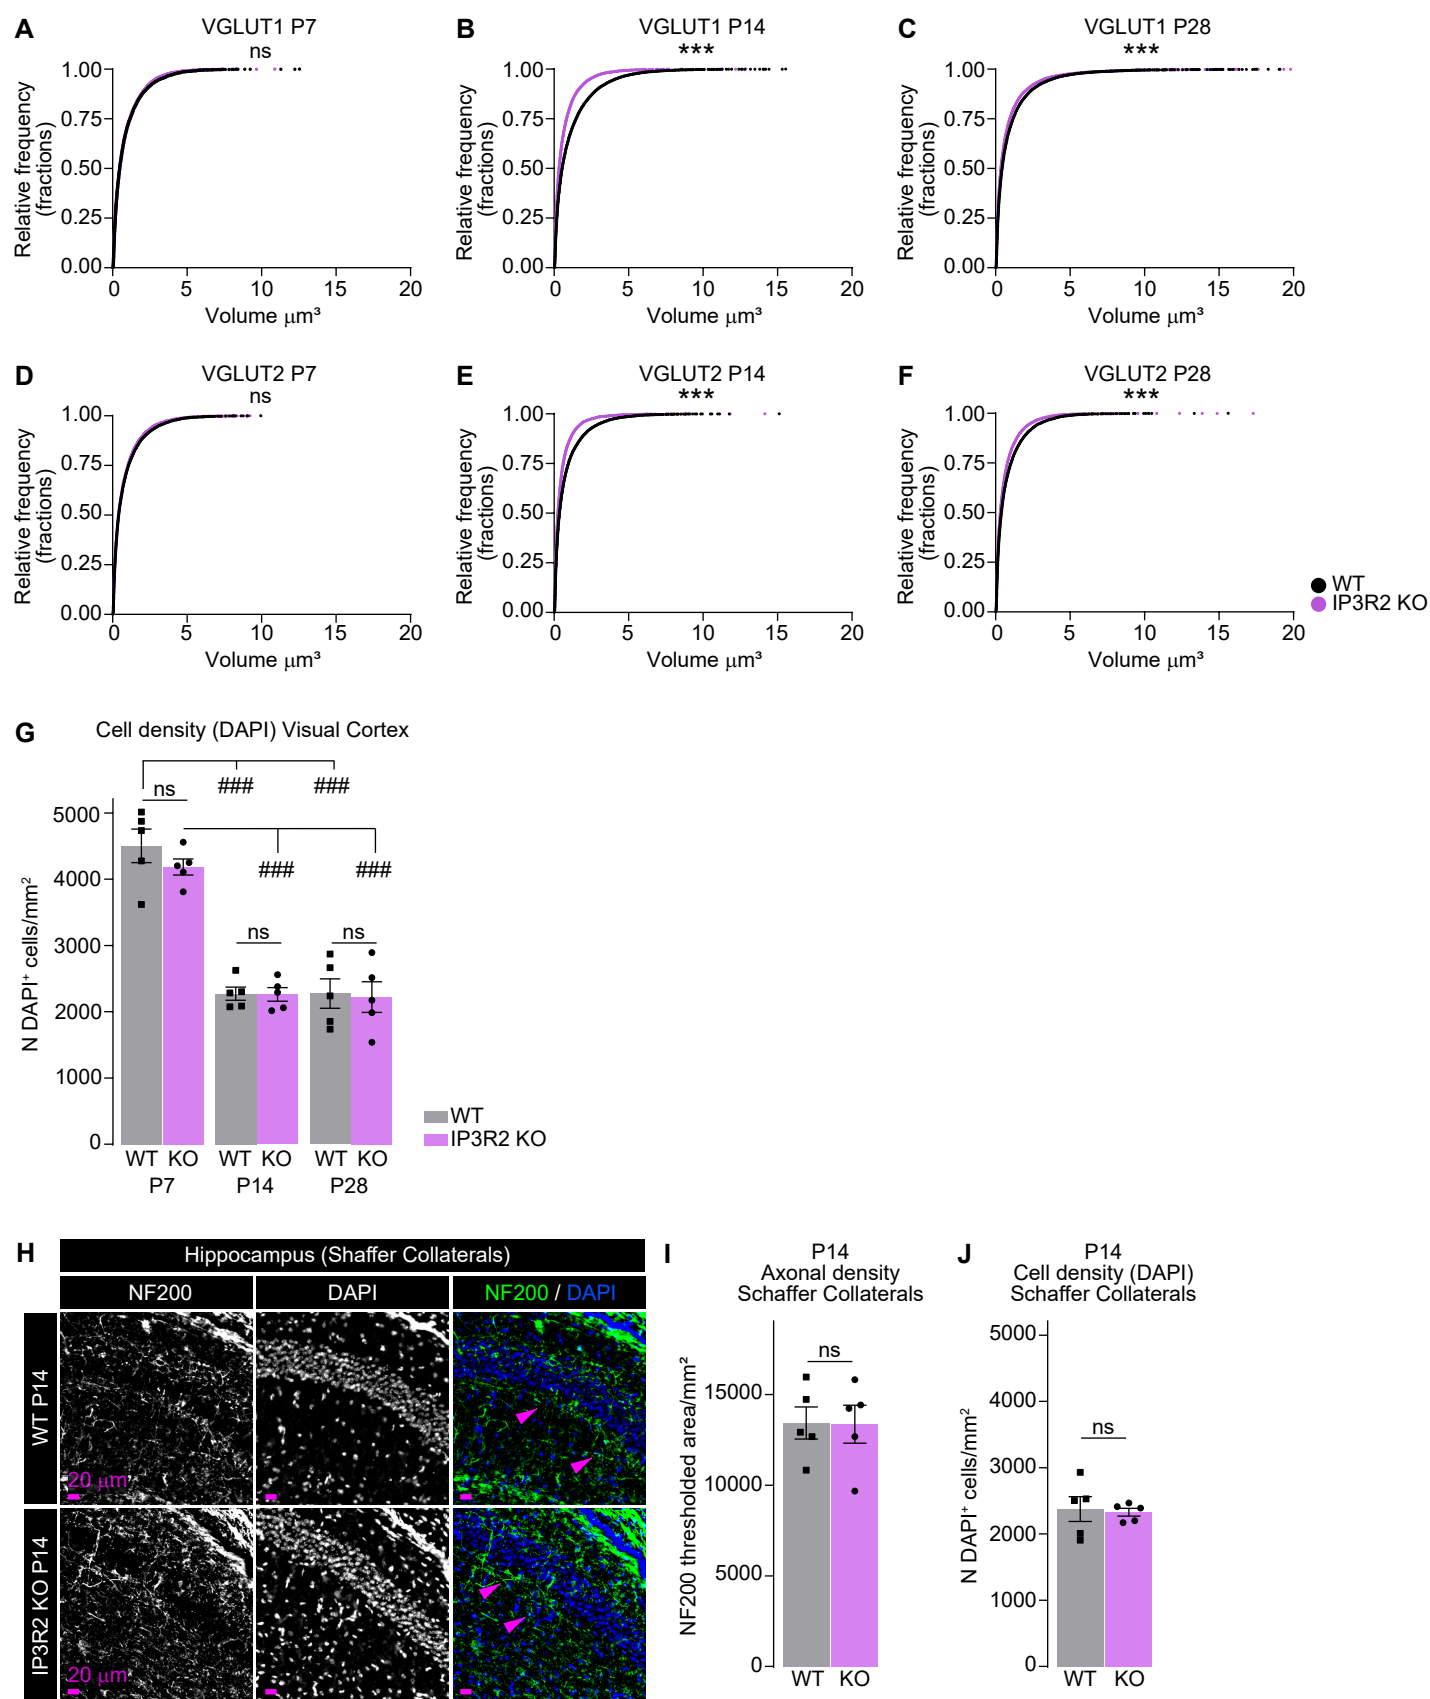

Figure S2

**Figure S2. VGLUT volumes are reduced in IP3R2 KO mice with no change in cell numbers, related to Figures 1-2.** See also Table S1. **A-F.** Cumulative distributions of volumes from 3D Imaris rendered images (see Fig. 1, Fig. S1) for VGLUT1 (**A-C**) and VGLUT2 (**D-F**) per age and genotype as labeled. Higher fraction of smaller volumes ( $<5 \mu\text{m}^3$ ) is observed in IP3R2 KO mice at P14 and P28, but not P7. \*\*\* $P < 0.001$  by Kolmogorov-Smirnov test comparing WT and KO within each age. ns denotes non-significant results ( $>0.05$ ). **G.** Quantification of Fig. 2A-B showing cell density (represented by number of DAPI positive (+) cells normalized to total area) is decreased across development from P7 to P28 similarly in WT and KO groups, with no difference between genotypes at any age tested. **H.** Hippocampal Schaffer collateral axon density is similar at P14 in WT and IP3R2 KO mice. Representative images of hippocampus in WT (left) and IP3R2 KO (right) labeled for NF200 and DAPI. Arrows indicate representative Schaffer collateral axons. **I-J.** Quantification of H showing NF200 (**I**) and DAPI (**J**) cell density. Graphs show mean  $\pm$  s.e.m. in G, I, J. Individual mouse data points are shown as circles and squares. Number of mice/ group (N) N=5. ### $P < 0.001$  by one-way ANOVA with post-hoc Tukey's test comparing cell density between age groups within each genotype. ns denotes non-significant ( $P > 0.05$ ) results comparing WT and KO groups by one-way ANOVA in G, and t-test in I-J.



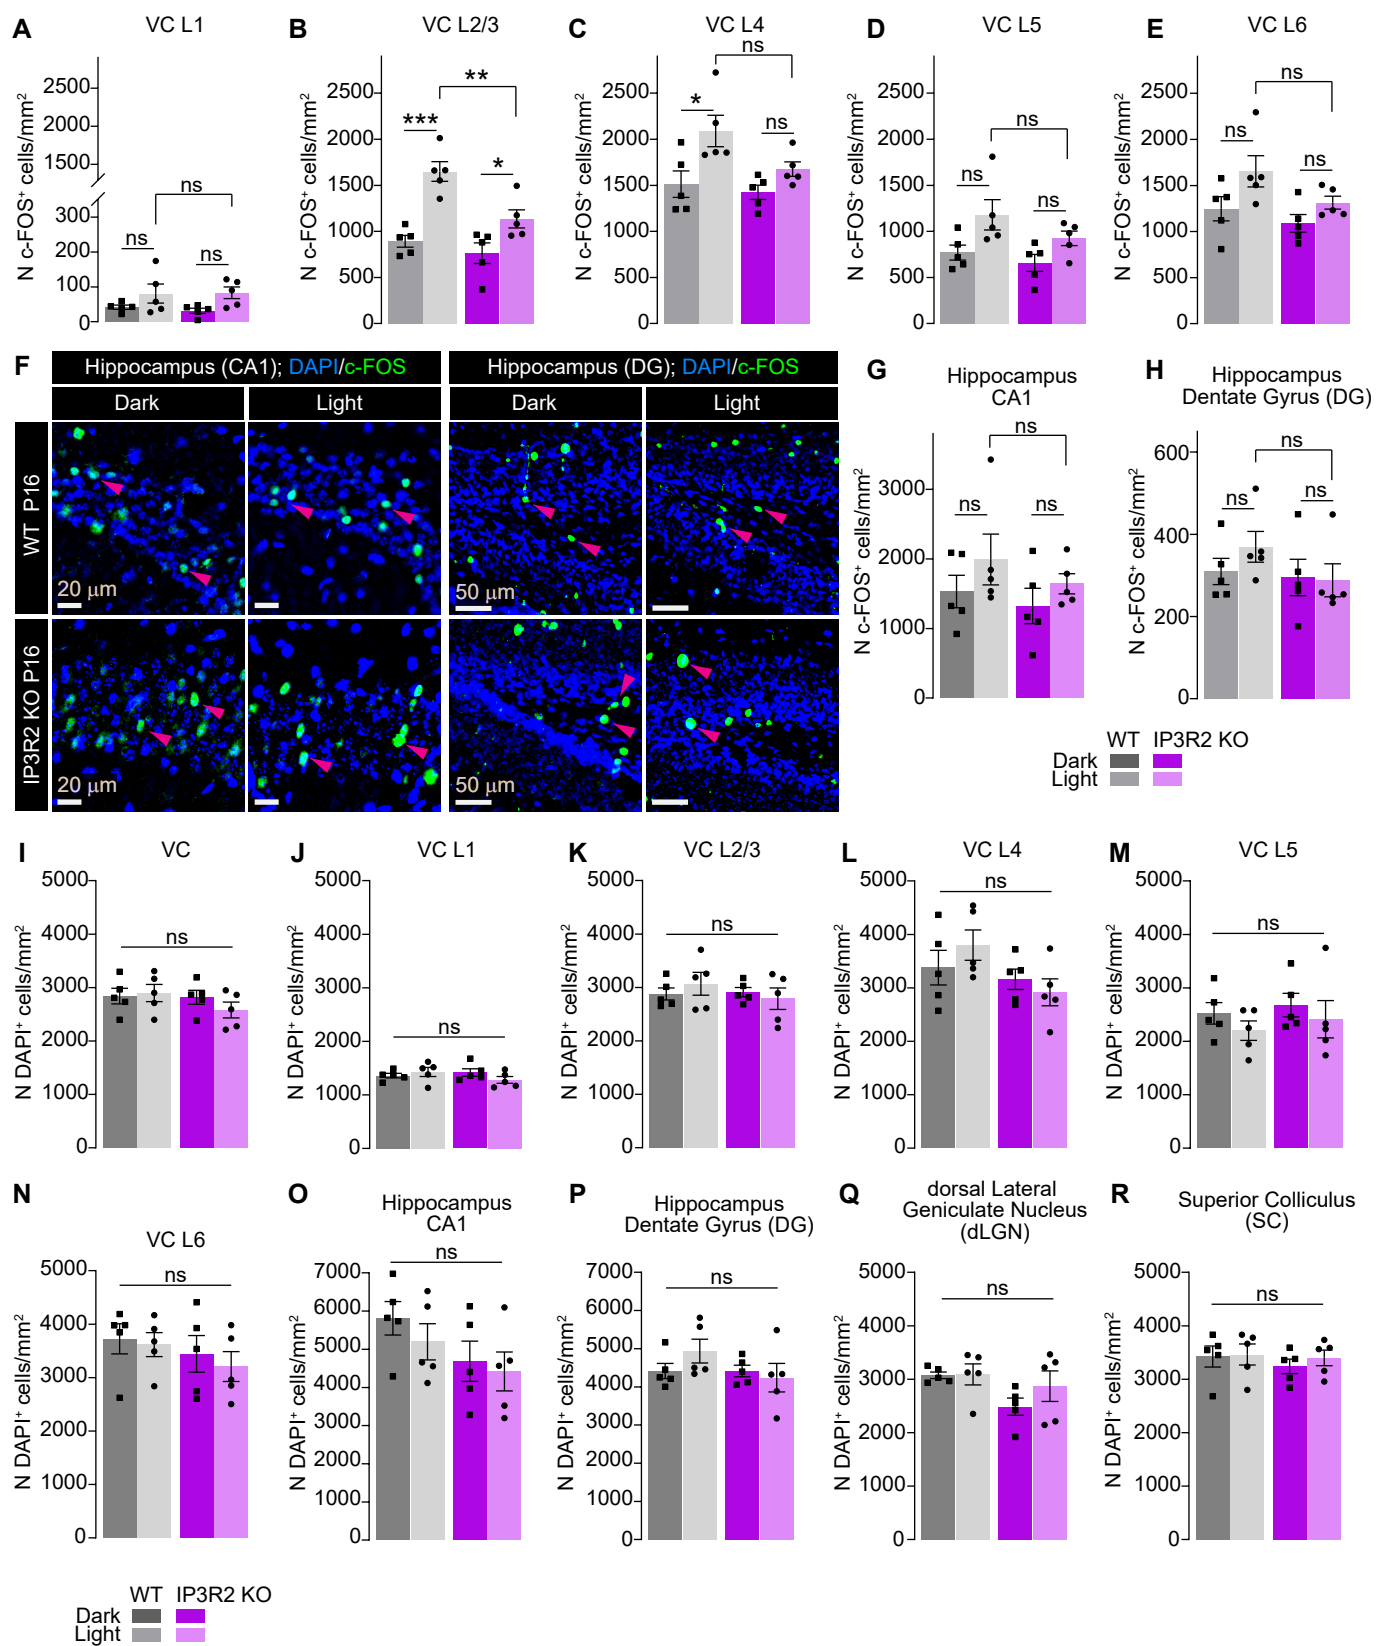

Figure S4

**Figure S4. Light-evoked c-FOS expression is blunted in IP3R2 KO mice visual circuit, related to Figure 4.** See also Table S1. **A-E.** Quantification of Fig.4 C-D separated by cortical layers represented as c-FOS positive cell numbers per area (c-FOS cell density). Light exposure induces a significant increase in c-FOS positive cell density in the WT in layers 2/3, and 4, and significant increase in L2/3 in the KO group. Light-evoked c-FOS density is lower in the KO layer 2/3 than WT. **F-H.** Light exposure does not induce increased c-FOS expression in the hippocampus. Example images of c-FOS (green) and DAPI to mark cell nuclei (blue) in the CA1 and DG regions of the hippocampus in both genotypes as labeled (**F**), as well as quantification for CA1 (**G**) and dentate gyrus (DG) (**H**) are shown. No difference is observed between light and dark conditions or the genotypes in either sub-region. **I-R.** Quantification of DAPI positive cells shows no difference between genotypes or light conditions in any of the analyzed brain regions. Graphs show mean  $\pm$  s.e.m. Individual mouse data points are shown as circles and squares. Number of mice/ group (N) N=5, KO DG N=4. Scale bar CA1 = 20  $\mu$ m, DG = 50  $\mu$ m. Arrowheads mark representative c-FOS positive (+) cells. \* $P \leq 0.05$ ; \*\* $P < 0.01$ ; \*\*\* $P < 0.001$  by one-way ANOVA with post-hoc Šidák's test. ns denotes non-significant results ( $P > 0.05$ ).

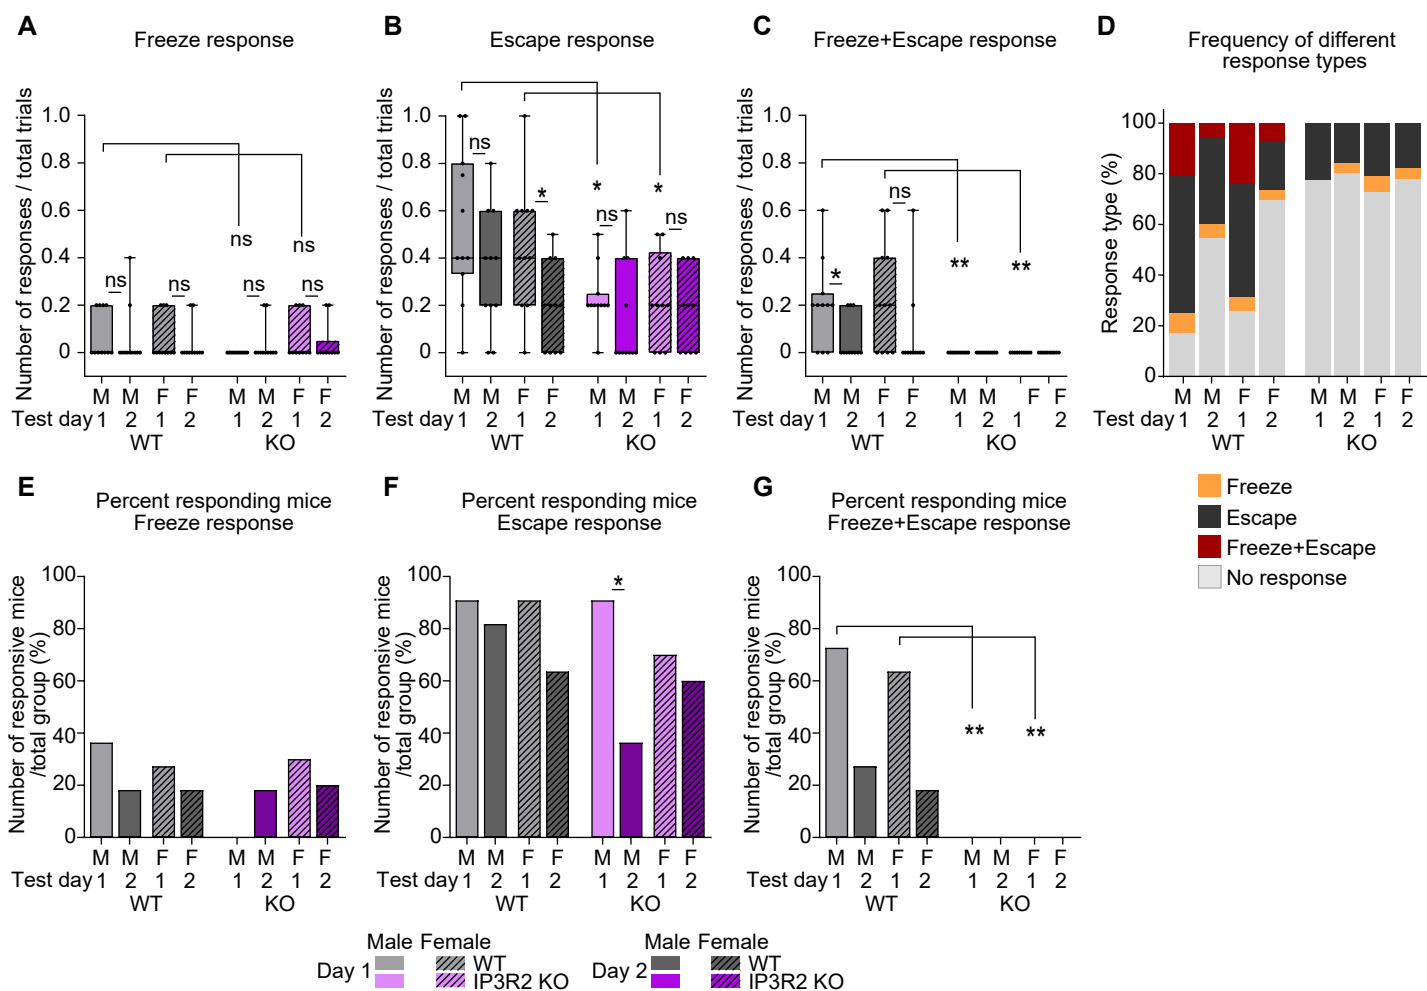

Figure S5

**Figure S5. Visually evoked defensive behavior is disrupted in IP3R2 KO mice, related to Figure 5.** See also Table S1. **A-C.** Average defensive responses separately quantified by response type as labeled (“Freeze”, “Escape”, and “Freeze+Escape”) across genotypes, sexes, and experimental days. “Escape” responses are significantly reduced, and “Freeze+Escape” responses are abrogated in KO mice of both sexes. Freeze responses are not different between genotypes. Graphs show box with range, line is median. Individual mouse data points are shown as circles. **D.** Fractions of each of the defensive response types (“Freeze” – orange; “Escape” – black; “Freeze+Escape” – maroon; “No response” – gray) out of total responses shown as percentage for each age and sex as labeled. **E-G.** Number of responders represented as percentage of mice responding to at least one trial per day out of total group number for each of the response types as labeled. All groups exhibited a similar percentage of responders, except for the “Freeze+Escape” response, which was entirely absent in KO mice. Number of mice (N) N=8-10/ sex/genotype. \* $P \leq 0.05$ ; \*\* $P < 0.01$ ; \*\*\* $P < 0.001$  by Mann-Whitney test. ns denotes non-significant results ( $P > 0.05$ ).



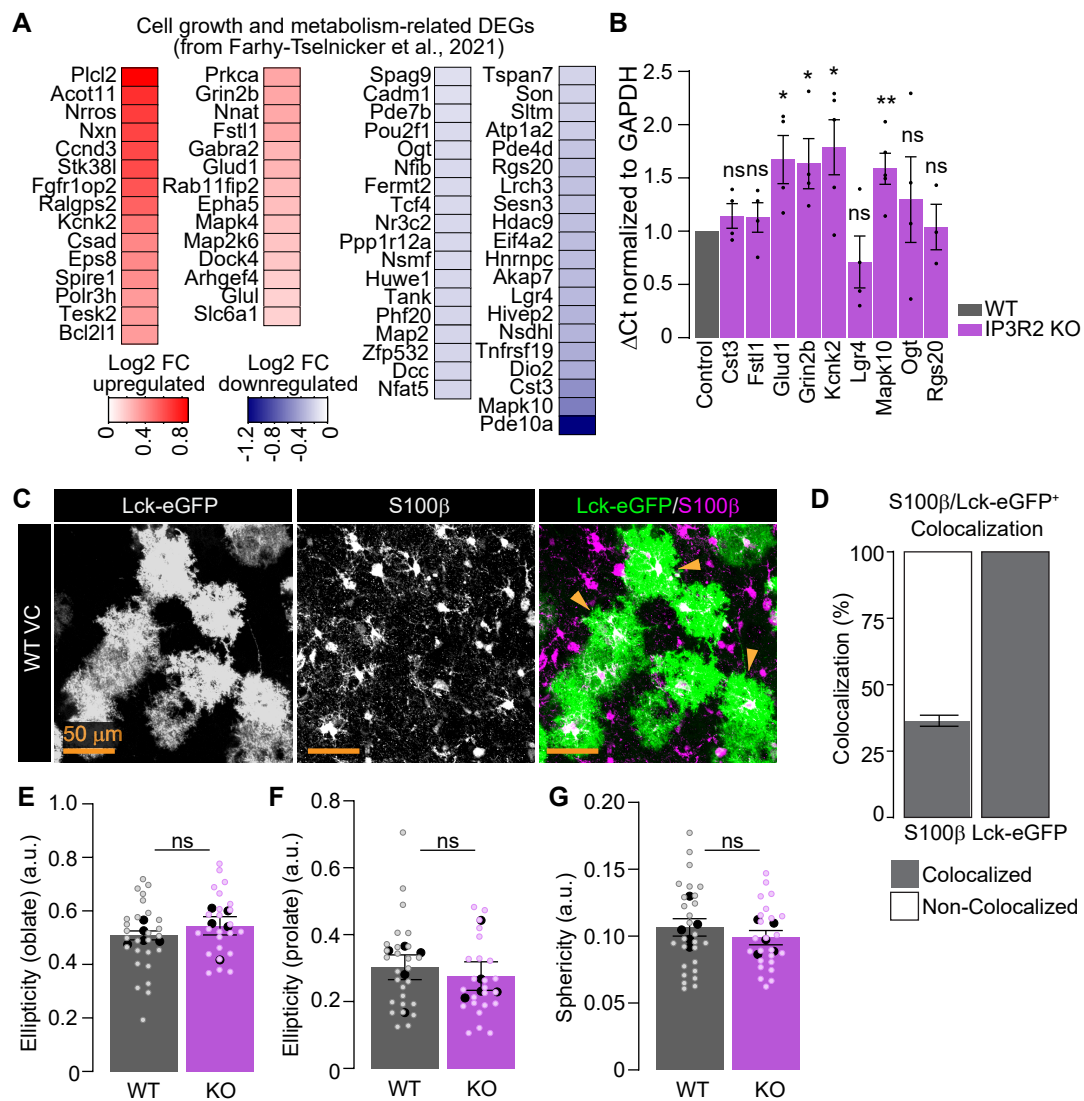

Figure S6

**Figure S6. Reduced morphology in IP3R2 KO astrocytes, related to Figure 6.** See also Table S1. **A.** Heatmap showing Log2 fold change for cell growth and metabolism-related differentially expressed genes (DEGs; obtained from published single nucleus RNA sequencing dataset, Farhy-Tselnicker et al., 2021<sup>4</sup>) in IP3R2 KO mice relative to WT. **B.** Quantification of qPCR represented as change in IP3R2 KO Ct ( $\Delta$ CT) relative to GAPDH normalized to WT  $\Delta$ CT. Number of mice/group (N) N=3-5 per gene, each reaction run in triplicates. \*P $\leq$ 0.05; \*\*P<0.01; ns denotes non-significant results (P>0.05) by t-test. **C-D.** Validation of AAV expression showing specificity and sparsity of Lck-eGFP labeling in VC astrocytes. Example images showing Lck-eGFP (green) and astrocyte specific marker S100 $\beta$  (magenta) (**C**) and quantification (**D**). Plot shows percentage of double labeled cells out of total astrocytes (S100 $\beta$  positive) or Lck-eGFP positive showing full overlap of Lck-eGFP expressing cells with S100 $\beta$  within each image. **E-G.** Astrocytic shape characteristics including ellipticity and sphericity are unaltered by IP3R2 KO. Graphs show mean  $\pm$  s.e.m. Black circles are average of signal in each mouse; colored open circles are data for each astrocyte. Number of mice/group (N) N=5, number of astrocytes = 25-27. Scale bar = 50  $\mu$ m. ns denotes non-significant results (P>0.05) by t-test.
