# Supplementary material for: Astrocyte Store-Released Calcium Modulates Visual Cortex Synapse Development and Circuit Function
Source: Research Square preprint supplement (doi:10.21203/rs.3.rs-7890067/v1), 2025-11-17
Supplement: Supplementary file 1 [file fd45a1be8ea52c28b21661e8.xlsx]

## Sheet: Figure 1
Related to	Figure 1
Figure 1B												Figure 1 E-G												Figure 1 F-H
S100B-IP3R2 colocalized		Descriptive statistics						Post-hoc analysis				VGlut1 puncta		Descriptive statistics						Post-hoc analysis				VGlut2 puncta		Descriptive statistics						Post-hoc analysis
	P7 wt	P7 ko	p14 wt	p14 ko	p28 wt	p28 ko		Tukey's multiple comparisons test	Adjusted P Value	Significant?			vg1P7 WT	vg1P7 KO	vg1P14 WT	vg1P14 KO	vg1P28 WT	vg1P28 KO		Tukey's multiple comparisons test	Adjusted P Value	Significant?			vg1P7 WT	vg1P7 KO	vg1P14 WT	vg1P14 KO	vg1P28 WT	vg1P28 KO		Tukey's multiple comparisons test	Adjusted P Value	Significant?
Mean	2752	11.05	2180	13.48	1905	10.71		P7 wt vs. P7 ko	<0.0001	Yes		Mean	19600000	21980000	61020000	41980000	57820000	40180000		vg1P7 WT vs. vg1P7 KO	0.994	No		Mean	23100000	20940000	49180000	29920000	36800000	24880000		vg2P7 WT vs. vg2P7 KO	0.9284	No
Std. Deviation	271.5	9.557	658.9	12.78	658	5.54		P7 wt vs. p14 wt	0.5177	No		Std. Deviation	5650221	3340210	9131101	4224571	5368147	10996909		vg1P7 WT vs. vg1P14 WT	<0.0001	Yes		Std. Deviation	2800893	3639780	5435255	2952457	3850325	1734070		vg2P7 WT vs. vg2P14 WT	<0.0001	Yes
Std. Error of Mean	156.7	5.518	380.4	7.38	379.9	3.198		P7 wt vs. p14 ko	<0.0001	Yes		Std. Error of Mean	2526856	1493787	4083552	1889286	2400708	4917967		vg1P7 WT vs. vg1P14 KO	0.0005	Yes		Std. Error of Mean	1252597	1627759	2430720	1320379	1721918	775500		vg2P7 WT vs. vg2P14 KO	0.06	No
Number of values	3	3	3	3	3	3		P7 wt vs. p28 wt	0.1656	No		Number of values	5	5	5	5	5	5		vg1P7 WT vs. vg1P28 WT	<0.0001	Yes		Number of values	5	5	5	5	5	5		vg2P7 WT vs. vg2P28 WT	<0.0001	Yes
								P7 wt vs. p28 ko	<0.0001	Yes										vg1P7 WT vs. vg1P28 KO	0.0013	Yes										vg2P7 WT vs. vg2P28 KO	0.9675	No
								P7 ko vs. p14 wt	0.0002	Yes										vg1P7 KO vs. vg1P14 WT	<0.0001	Yes										vg2P7 KO vs. vg2P14 WT	<0.0001	Yes
Comparing age and genotype groups								P7 ko vs. p14 ko	>0.9999	No		Comparing age and genotype groups								vg1P7 KO vs. vg1P14 KO	0.0018	Yes		Comparing age and genotype groups								vg2P7 KO vs. vg2P14 KO	0.0068	Yes
ANOVA summary		Significant?						P7 ko vs. p28 wt	0.0008	Yes		ANOVA summary		Significant?						vg1P7 KO vs. vg1P28 WT	<0.0001	Yes		ANOVA summary		Significant?						vg2P7 KO vs. vg2P28 WT	<0.0001	Yes
F	30.93							P7 ko vs. p28 ko	>0.9999	No		F	30.67							vg1P7 KO vs. vg1P28 KO	0.0047	Yes		F	44.01							vg2P7 KO vs. vg2P28 KO	0.5223	No
P value	<0.0001	Yes						p14 wt vs. p14 ko	0.0002	Yes		P value	<0.0001	Yes						vg1P14 WT vs. vg1P14 KO	0.003	Yes		P value	<0.0001	Yes						vg2P14 WT vs. vg2P14 KO	<0.0001	Yes
								p14 wt vs. p28 wt	0.9512	No										vg1P14 WT vs. vg1P28 WT	0.9772	No										vg2P14 WT vs. vg2P28 WT	0.0002	Yes
								p14 wt vs. p28 ko	0.0002	Yes										vg1P14 WT vs. vg1P28 KO	0.0011	Yes										vg2P14 WT vs. vg2P28 KO	<0.0001	Yes
								p14 ko vs. p28 wt	0.0009	Yes										vg1P14 KO vs. vg1P28 WT	0.0168	Yes										vg2P14 KO vs. vg2P28 WT	0.0567	No
								p14 ko vs. p28 ko	>0.9999	No										vg1P14 KO vs. vg1P28 KO	0.9984	No										vg2P14 KO vs. vg2P28 KO	0.2647	No
								p28 wt vs. p28 ko	0.0008	Yes										vg1P28 WT vs. vg1P28 KO	0.0064	Yes										vg2P28 WT vs. vg2P28 KO	0.0003	Yes
Neun-IP3R2 colocalized		Descriptive statistics						Post-hoc analysis				PSD95 puncta (VGlut1)			Descriptive statistics					Post-hoc analysis				PSD95 puncta (VGlut2)			Descriptive statistics					Post-hoc analysis
	p7 neun wt	p7 neun ko	p14 neun wt	p14 neun ko	p28 neun wt	p28 neun ko		Tukey's multiple comparisons test	Adjusted P Value	Significant?			psdP7 WT	psdP7 KO	psdP14 WT	psdP14 KO	psdP28 WT	psdP28 KO		Tukey's multiple comparisons test	Adjusted P Value	Significant?			psdP7 WT	psdP7 KO	psdP14 WT	psdP14 KO	psdP28 WT	psdP28 KO		Tukey's multiple comparisons test	Adjusted P Value	Significant?
Mean	135.4	1.255	47.31	3.66	112.6	0.3501		P7 wt vs. P7 ko	0.0585	No		Mean	71400000	54920000	88140000	92820000	105920000	94100000		psdP7 WT vs. psdP7 KO	0.8005	No		Mean	71420000	57100000	98620000	98660000	103600000	92400000		psdP7 WT vs. psdP7 KO	0.8166	No
Std. Deviation	17.86	2.087	27.55	1.877	118.8	0.2498		P7 wt vs. p14 wt	0.3286	No		Std. Deviation	34997786	22685171	8130375	11625704	15853296	18832419		psdP7 WT vs. psdP14 WT	0.7902	No		Std. Deviation	32183023	25340580	9583945	10264892	2792848	11857698		psdP7 WT vs. psdP14 WT	0.2167	No
Std. Error of Mean	10.31	1.205	15.91	1.084	68.56	0.1442		P7 wt vs. p14 ko	0.0645	No		Std. Error of Mean	15651486	10145117	3636014	5199173	7089810	8422114		psdP7 WT vs. psdP14 KO	0.5793	No		Std. Error of Mean	14392686	11332652	4286070	4590599	1249000	5302924		psdP7 WT vs. psdP14 KO	0.2154	No
Number of values	3	3	3	3	3	3		P7 wt vs. p28 wt	0.9924	No		Number of values	5	5	5	5	5	5		psdP7 WT vs. psdP28 WT	0.1237	No		Number of values	5	5	5	5	5	5		psdP7 WT vs. psdP28 WT	0.0975	No
								P7 wt vs. p28 ko	0.0564	No										psdP7 WT vs. psdP28 KO	0.5191	No										psdP7 WT vs. psdP28 KO	0.4805	No
								P7 ko vs. p14 wt	0.8636	No										psdP7 KO vs. psdP14 WT	0.1494	No										psdP7 KO vs. psdP14 WT	0.0169	Yes
Comparing age and genotype groups								P7 ko vs. p14 ko	>0.9999	No		Comparing age and genotype groups								psdP7 KO vs. psdP14 KO	0.0736	No		Comparing age and genotype groups								psdP7 KO vs. psdP14 KO	0.0168	Yes
ANOVA summary		Significant?						P7 ko vs. p28 wt	0.1436	No		ANOVA summary		Significant?						psdP7 KO vs. psdP28 WT	0.0076	Yes		ANOVA summary		Significant?						psdP7 KO vs. psdP28 WT	0.0061	Yes
F	4.317							P7 ko vs. p28 ko	>0.9999	No		F	3.958							psdP7 KO vs. psdP28 KO	0.0599	No		F	3.958							psdP7 KO vs. psdP28 KO	0.056	No
P value	0.0177	Yes						p14 wt vs. p14 ko	0.8869	No		P value	0.0093	Yes						psdP14 WT vs. psdP14 KO	0.9991	No		P value	0.0093	Yes						psdP14 WT vs. psdP14 KO	>0.9999	No
								p14 wt vs. p28 wt	0.6189	No										psdP14 WT vs. psdP28 WT	0.7468	No										psdP14 WT vs. psdP28 WT	0.9979	No
								p14 wt vs. p28 ko	0.8543	No										psdP14 WT vs. psdP28 KO	0.9972	No										psdP14 WT vs. psdP28 KO	0.9941	No
								p14 ko vs. p28 wt	0.1573	No										psdP14 KO vs. psdP28 WT	0.9116	No										psdP14 KO vs. psdP28 WT	0.998	No
								p14 ko vs. p28 ko	>0.9999	No										psdP14 KO vs. psdP28 KO	>0.9999	No										psdP14 KO vs. psdP28 KO	0.9939	No
								p28 wt vs. p28 ko	0.1387	No										psdP28 WT vs. psdP28 KO	0.9409	No										psdP28 WT vs. psdP28 KO	0.9247	No
comparison between WT astrocyte and WT neuronal IP3R2 signals								Post-hoc analysis				Synapses (VGlut1-PSD95)			Descriptive statistics					Post-hoc analysis				Synapses (VGlut2-PSD95)			Descriptive statistics					Post-hoc analysis
								Tukey's multiple comparisons test	Adjusted P Value	Significant?			synP7 WT	synP7 KO	synP14 WT	synP14 KO	synP28 WT	synP28 KO		Tukey's multiple comparisons test	Adjusted P Value	Significant?			synP7 WT	synP7 KO	synP14 WT	synP14 KO	synP28 WT	synP28 KO		Tukey's multiple comparisons test	Adjusted P Value	Significant?
ANOVA summary		Significant?						P7 wt astro vs. p14 wt astro	0.5254	No		Mean	3872000	3220000	18160000	9508000	17920000	12262000		synP7 WT vs. synP7 KO	0.9998	No		Mean	4136000	2550000	12280000	5732000	10998000	5526000		synP7 WT vs. synP7 KO	0.4821	No
F	28.28							P7 wt astro vs. p28 wt astro	0.1709	No		Std. Deviation	2258256	829940	1502664	2520530	5230392	6660940		synP7 WT vs. synP14 WT	<0.0001	Yes		Std. Deviation	1771279	537913	1942164	1103232	1429517	1067136		synP7 WT vs. synP14 WT	<0.0001	Yes
P value	<0.0001	Yes						P7 wt astro vs. p7 neun wt	<0.0001	Yes		Std. Error of Mean	1009923	371160	672012	1127215	2339102	2978863		synP7 WT vs. synP14 KO	0.2129	No		Std. Error of Mean	792140	240562	868562	493380	639300	477238		synP7 WT vs. synP14 KO	0.4754	No
								P7 wt astro vs. p14 neun wt	<0.0001	Yes		Number of values	5	5	5	5	5	5		synP7 WT vs. synP28 WT	<0.0001	Yes		Number of values	5	5	5	5	5	5		synP7 WT vs. synP28 WT	<0.0001	Yes
								P7 wt astro vs. p28 neun wt	<0.0001	Yes										synP7 WT vs. synP28 KO	0.0201	Yes										synP7 WT vs. synP28 KO	0.6182	No
								p14 wt astro vs. p28 wt astro	0.9528	No										synP7 KO vs. synP14 WT	<0.0001	Yes										synP7 KO vs. synP14 WT	<0.0001	Yes
								p14 wt astro vs. p7 neun wt	0.0005	Yes		Comparing age and genotype groups								synP7 KO vs. synP14 KO	0.1298	No		Comparing age and genotype groups								synP7 KO vs. synP14 KO	0.0153	Yes
								p14 wt astro vs. p14 neun wt	0.0003	Yes		ANOVA summary		Significant?						synP7 KO vs. synP28 WT	<0.0001	Yes		ANOVA summary		Significant?						synP7 KO vs. synP28 WT	<0.0001	Yes
								p14 wt astro vs. p28 neun wt	0.0004	Yes		F	14.92							synP7 KO vs. synP28 KO	0.0106	Yes		F	14.92							synP7 KO vs. synP28 KO	0.0262	Yes
								p28 wt astro vs. p7 neun wt	0.0016	Yes		P value	<0.0001	Yes						synP14 WT vs. synP14 KO	0.0156	Yes		P value	<0.0001	Yes						synP14 WT vs. synP14 KO	<0.0001	Yes
								p28 wt astro vs. p14 neun wt	0.0011	Yes										synP14 WT vs. synP28 WT	>0.9999	No										synP14 WT vs. synP28 WT	0.6927	No
								p28 wt astro vs. p28 neun wt	0.0015	Yes										synP14 WT vs. synP28 KO	0.1756	No										synP14 WT vs. synP28 KO	<0.0001	Yes
								p7 neun wt vs. p14 neun wt	0.9997	No										synP14 KO vs. synP28 WT	0.0196	Yes										synP14 KO vs. synP28 WT	<0.0001	Yes
								p7 neun wt vs. p28 neun wt	>0.9999	No										synP14 KO vs. synP28 KO	0.8557	No										synP14 KO vs. synP28 KO	0.9999	No
								p14 neun wt vs. p28 neun wt	>0.9999	No										synP28 WT vs. synP28 KO	0.2096	No										synP28 WT vs. synP28 KO	<0.0001	Yes

## Sheet: Figure S1
Related to	Figure S1
Figure S1C				Figure S1 D-F
IP3R2 dCt normalized to GAPDH				P7 IP3R2 protein signal norm to GAPDH				P14 IP3R2 protein signal norm to GAPDH				P30 IP3R2 protein signal norm to GAPDH
Descriptive statistics				Descriptive statistics				Descriptive statistics				Descriptive statistics
	p14 wt	p14 ko			P7 WT	P7 KO			P14 WT	P14 KO			P30 WT	P30 KO
Mean	5.097	0		Mean	0.1359	0.002483		Mean	0.1534	0.02741		Mean	0.06204	0.01008
Std. Deviation	0.2782	0		Std. Deviation	0.01235	0.002006		Std. Deviation	0.03224	0.01643		Std. Deviation	0.005693	0.0008391
Std. Error of Mean	0.1606	0		Std. Error of Mean	0.007133	0.001158		Std. Error of Mean	0.01862	0.009487		Std. Error of Mean	0.003287	0.0004844
Number of values	3	3		Number of values	3	3		Number of values	3	3		Number of values	3	3
Comparing WT to KO				Comparing WT to KO				Comparing WT to KO				Comparing WT to KO
Unpaired t-test summary		Significant?		unpaired t-test summary		Significant?		unpaired t-test summary		Significant?		unpaired t-test summary		Significant?
P value	<0.0001	Yes		P value	<0.0001	Yes		P value	0.0038	Yes		P value	<0.0001	Yes

## Sheet: Figure 2
Related to	Figure 2
Figure 2C
NF200 (axon density) across age			Descriptive statistics
	p7WT	p7KO	p14WT	p14KO	p28WT	p28KO
Mean	10460	9883	13953	15108	20239	18117
Std. Deviation	1796	1870	3162	2600	3680	2993
Std. Error of Mean	803	836.3	1414	1163	1646	1339
Number of values	5	5	5	5	5	5
Comparing age and genotype groups
ANOVA summary		Significant?		Post-hoc analysis
F	30.93			Tukey's multiple comparisons test	Adjusted P Value	Significant?
P value	<0.0001	Yes		p7WT vs. p7KO	0.9994	No
				p7WT vs. p14WT	0.374	No
				p7WT vs. p14KO	0.1224	No
				p7WT vs. p28WT	0.0001	Yes
				p7WT vs. p28KO	0.0025	Yes
				p7KO vs. p14WT	0.2231	No
				p7KO vs. p14KO	0.0629	No
				p7KO vs. p28WT	<0.0001	Yes
				p7KO vs. p28KO	0.0011	Yes
				p14WT vs. p14KO	0.9847	No
				p14WT vs. p28WT	0.0164	Yes
				p14WT vs. p28KO	0.2035	No
				p14KO vs. p28WT	0.0704	No
				p14KO vs. p28KO	0.5335	No
				p28WT vs. p28KO	0.8269	No

## Sheet: Figure S2
Related to	Figure S2
Figure S2 A-F									Figure S2 G									Figure S2 I-J
p7 VGlut1 volume cumulative frequency				p7 VGlut2 volume cumulative frequency					DAPI across age		Descriptive statistics							P14 NF200 Scol
	P7 WT VG1	P7 KO VG1			P7 WT VG1	P7 KO VG1				WT P7	KO P7	WT P14	KO P14	WT P28	KO P28			Descriptive statistics
Mean	0.8971	0.8491		Mean	0.8392	0.7844			Mean	4504	4186	2274	2262	2275	2221				P14 WT	P14 KO
Std. Deviation	1.117	1.009		Std. Deviation	1.085	0.9982			Std. Deviation	567.3	269.4	222.7	226.3	494.3	514.5			Mean	13424	13366
Std. Error of Mean	0.01215	0.01103		Std. Error of Mean	0.01086	0.01119			Std. Error of Mean	253.7	120.5	99.58	101.2	221.1	230.1			Std. Deviation	1984	2342
Number of values	8444	8377		Number of values	9975	7957			Number of values	5	5	5	5	5	5			Std. Error of Mean	887.4	1047
																		Number of values	5	5
Comparing WT to KO				Comparing WT to KO
Kolmogorov-smirnov summary		Significant?		Kolmogorov-smirnov summary		Significant?			Comparing age and genotype groups									Comparing WT to KO
KS D	0.01816			KS D	0.0181				ANOVA summary		Significant?							Unpaired t-test summary		Significant?
P value	0.1248	No		P value	0.1101	No			F	35.01								P value	0.9671	No
									P value	<0.0001	Yes
p14 VGlut1 volume cumulative frequency				p14 VGlut2 volume cumulative frequency														P14 DAPI Scol
	P7 WT VG2	P7 KO VG2			P7 WT VG2	P7 KO VG2			Post-hoc analysis									Descriptive statistics
Mean	1.12	0.6654		Mean	0.791	0.5154			Tukey's multiple comparisons test	Adjusted P Value	Significant?								P14 WT	P14 KO
Std. Deviation	1.47	0.8935		Std. Deviation	1.109	0.7402			WT P7 vs. KO P7	0.842	No							Mean	2376	2329
Std. Error of Mean	0.00967	0.006647		Std. Error of Mean	0.008229	0.007278			WT P7 vs. WT P14	<0.0001	Yes							Std. Deviation	419.1	133.6
Number of values	23124	18071		Number of values	18159	10343			WT P7 vs. KO P14	<0.0001	Yes							Std. Error of Mean	187.4	59.76
									WT P7 vs. WT P28	<0.0001	Yes							Number of values	5	5
Kolmogorov-smirnov summary		Significant?		Kolmogorov-smirnov summary		Significant?			WT P7 vs. KO P28	<0.0001	Yes
KS D	0.1417			KS D	0.1125				KO P7 vs. WT P14	<0.0001	Yes							Comparing WT to KO
P value	<0.0001	Yes		P value	<0.0001	Yes			KO P7 vs. KO P14	<0.0001	Yes							Unpaired t-test summary		Significant?
									KO P7 vs. WT P28	<0.0001	Yes							P value	0.8197	No
p28 VGlut1 volume cumulative frequency				p28 VGlut2 volume cumulative frequency					KO P7 vs. KO P28	<0.0001	Yes
	P14 WT VG2	P14 KO VG2			P14 WT VG2	P14 KO VG2			WT P14 vs. KO P14	>0.9999	No
Mean	1.006	0.8637		Mean	0.8093	0.6484			WT P14 vs. WT P28	>0.9999	No
Std. Deviation	1.696	1.468		Std. Deviation	1.084	0.9137			WT P14 vs. KO P28	>0.9999	No
Std. Error of Mean	0.01111	0.01247		Std. Error of Mean	0.009244	0.00883			KO P14 vs. WT P28	>0.9999	No
Number of values	23300	13861		Number of values	13749	10709			KO P14 vs. KO P28	>0.9999	No
									WT P28 vs. KO P28	>0.9999	No
Kolmogorov-smirnov summary		Significant?		Kolmogorov-smirnov summary		Significant?
KS D	0.05574			KS D	0.06519
P value	<0.0001	Yes		P value	<0.0001	Yes

## Sheet: Figure 3
Related to	Figure 3
Figure 3C-E					Figure 3 F
P14 VGat puncta					P14 VGat volume cumulative frequency
Descriptive statistics						P14 WT VGAT	P14 KO VGAT
	WT	KO			Mean	0.8051	0.8059
Mean	45334005	45208702			Std. Deviation	1.071	1.058
Std. Deviation	3113737	4181716			Std. Error of Mean	0.007254	0.006934
Std. Error of Mean	1176882	1580540			Number of values	21810	23280
Number of values	7	7
					Comparing WT to KO
Comparing WT to KO					Kolmogorov-smirnov summary		Significant?
unpaired t-test summary		Significant?			KS D	0.01203
P value	0.9503	No			P value	0.065	No
P14 Gephyrin puncta
Descriptive statistics
	WT	KO
Mean	79974095	77335261
Std. Deviation	11651827	8886468
Std. Error of Mean	4403977	3358769
Number of values	7	7
unpaired t-test summary		Significant?
P value	0.6423	No
P14 VGat/Gephjyrin synapses
Descriptive statistics
	WT	KO
Mean	17869387	19655164
Std. Deviation	6708753	4731333
Std. Error of Mean	2535670	1788276
Number of values	7	7
unpaired t-test summary		Significant?
P value	0.5756	No

## Sheet: Figure 4
Related to	Figure 4
Figure 4E
VC C-FOS/Area		Descriptive statistics				Post-hoc analysis
	WT dark	WT light	KO dark	KO light		Šidák multiple comparison test	Adjusted P Value	Significant?
Mean	917.4	1404	814.2	1059		wt dark vs. wt light	0.004	Yes
Std. Deviation	179.7	286	156.2	91.86		wt light vs. ko light	0.2206	No
Std. Error of Mean	80.38	127.9	69.86	41.08		ko dark vs. ko light	0.046	Yes
Number of values	5	5	5	5		wt dark vs. ko dark	0.8766	No
Comparing light pulse conditions and genotype groups
ANOVA summary		Significant?
F	9.008
P value	0.001	Yes
Figure 4G
LGN C-FOS/Area		Descriptive statistics				Post-hoc analysis
	WT dark	WT light	KO dark	KO light		Šidák multiple comparison test	Adjusted P Value	Significant?
Mean	73.99	328.9	69.13	233.8		wt dark vs. wt light	<0.0001	Yes
Std. Deviation	23.86	46.14	38.81	66.02		wt light vs. ko light	0.0002	Yes
Std. Error of Mean	10.67	20.64	17.36	29.52		ko dark vs. ko light	0.0199	Yes
Number of values	5	5	5	5		wt dark vs. ko dark	0.9997	No
ANOVA summary		Significant?
F	37.8
P value	<0.0001	Yes
Figure 4I
SC C-FOS/Area		Descriptive statistics				Post-hoc analysis
	WT dark	WT light	KO dark	KO light		Šidák multiple comparison test	Adjusted P Value	Significant?
Mean	41.93	328.2	31.8	151.5		wt dark vs. wt light	<0.0001	Yes
Std. Deviation	18.13	107.7	11.87	60.25		wt light vs. ko light	0.0321	Yes
Std. Error of Mean	8.107	48.14	5.31	26.94		ko dark vs. ko light	0.0016	Yes
Number of values	5	5	5	5		wt dark vs. ko dark	0.9984	No
ANOVA summary		Significant?
F	24.16
P value	<0.0001	Yes

## Sheet: Figure S4
Related to	Figure S4
Figure S4A-E										Figure S4G-H											Figure S4I-M										Figure S4N-O										Figure S4Q-R
L1 C-FOS/Area		Descriptive statistics				Post-hoc analysis				CA1 C-FOS/Area		Descriptive statistics				Post-hoc analysis					VC DAPI/Area		Descriptive statistics				Post-hoc analysis				CA1 DAPI/Area		Descriptive statistics				Post-hoc analysis				dLGN DAPI/Area		Descriptive statistics				Post-hoc analysis
	WT dark	WT light	KO dark	KO light		Šidák multiple comparison test	Adjusted P Value	Significant?			WT dark	WT light	KO dark	KO light		Šidák multiple comparison test	Adjusted P Value	Significant?				WT dark	WT light	KO dark	KO light		Šidák multiple comparison test	Adjusted P Value	Significant?			WT dark	WT light	KO dark	KO light		Šidák multiple comparison test	Adjusted P Value	Significant?			WT dark	WT light	KO dark	KO light		Šidák multiple comparison test	Adjusted P Value	Significant?
Mean	41.81	80.9	31.59	82.92		wt dark vs. wt light	0.3912	No		Mean	1532	1992	1324	1642		wt dark vs. wt light	0.6513	No			Mean						wt dark vs. wt light	0.9979	No		Mean	5812	5194	4683	4418		wt dark vs. wt light	0.8566	No		Mean	3074	3091	2487	2871		wt dark vs. wt light	>0.9999	No
Std. Deviation	13.24	60.85	16.59	37.43		wt light vs. ko light	>0.9999	No		Std. Deviation	523.1	817.3	567.9	324.3		wt light vs. ko light	0.8299	No			Std. Deviation						wt light vs. ko light	0.4709	No		Std. Deviation	983.4	1059	1179	1141		wt light vs. ko light	0.7286	No		Std. Deviation	138.6	441.4	357.4	638.5		wt light vs. ko light	0.8977	No
Std. Error of Mean	5.92	27.21	7.42	16.74		ko dark vs. ko light	>0.9999	No		Std. Error of Mean	233.9	365.5	254	145		ko dark vs. ko light	0.8725	No			Std. Error of Mean						ko dark vs. ko light	0.7145	No		Std. Error of Mean	439.8	473.5	527.3	510.3		ko dark vs. ko light	0.9925	No		Std. Error of Mean	61.99	197.4	159.8	285.5		ko dark vs. ko light	0.5478	No
Number of values	5	5	5	5		wt dark vs. ko dark	0.9882	No		Number of values	5	5	5	5		wt dark vs. ko dark	0.9692	No			Number of values		5	5	5	5	wt dark vs. ko dark	>0.9999	No		Number of values	5	5	5	5		wt dark vs. ko dark	0.4063	No		Number of values	5	5	5	5		wt dark vs. ko dark	0.1786	No
Comparing light pulse conditions and genotype groups										Comparing light pulse conditions and genotype groups											Comparing light pulse conditions and genotype groups										Comparing light pulse conditions and genotype groups										Comparing light pulse conditions and genotype groups
ANOVA summary		Significant?								ANOVA summary		Significant?									ANOVA summary		Significant?								ANOVA summary		Significant?								ANOVA summary		Significant?
F	2.518									F	1.142										F	0.9036									F	1.58									F	2.1
P value	0.095	No								P value	0.3621	No									P value	0.4611	No								P value	0.2332	No								P value	0.1405	No
L2-3 C-FOS/Area		Descriptive statistics				Post-hoc analysis				DG C-FOS/Area		Descriptive statistics				Post-hoc analysis					L1DAPI/Area		Descriptive statistics				Post-hoc analysis				DG DAPI/Area		Descriptive statistics				Post-hoc analysis				SC DAPI/Area		Descriptive statistics				Post-hoc analysis
	WT dark	WT light	KO dark	KO light		Šidák multiple comparison test	Adjusted P Value	Significant?			WT dark	WT light	KO dark	KO light		Šidák multiple comparison test	Adjusted P Value	Significant?				WT dark	WT light	KO dark	KO light		Šidák multiple comparison test	Adjusted P Value	Significant?			WT dark	WT light	KO dark	KO light		Šidák multiple comparison test	Adjusted P Value	Significant?			WT dark	WT light	KO dark	KO light		Šidák multiple comparison test	Adjusted P Value	Significant?
Mean	892.7	1649	764.1	1135		wt dark vs. wt light	0.0001	Yes		Mean	309.6	369.4	295	288.1		wt dark vs. wt light	0.7486	No			Mean	1360	1430	1420	1281		wt dark vs. wt light	0.9217	No		Mean	4416	4938	4416	4241		wt dark vs. wt light	0.5867	No		Mean	3427	3463	3240	3400		wt dark vs. wt light	0.9998	No
Std. Deviation	141.7	239.2	250.7	219.9		wt light vs. ko light	0.0053	Yes		Std. Deviation	71.78	83.65	99.14	90.05		wt light vs. ko light	0.4959	No			Std. Deviation	95.79	187.2	157.7	142		wt light vs. ko light	0.439	No		Std. Deviation	448.1	698.2	341.1	840.3		wt light vs. ko light	0.3204	No		Std. Deviation	440.2	438.4	301.1	327.9		wt light vs. ko light	0.9983	No
Std. Error of Mean	63.37	107	112.1	98.36		ko dark vs. ko light	0.0612	No		Std. Error of Mean	32.1	37.41	44.34	40.27		ko dark vs. ko light	>0.9999	No			Std. Error of Mean	42.84	83.73	70.53	63.49		ko dark vs. ko light	0.5043	No		Std. Error of Mean	200.4	312.3	152.5	375.8		ko dark vs. ko light	0.9866	No		Std. Error of Mean	196.8	196.1	134.6	146.6		ko dark vs. ko light	0.9463	No
Number of values	5	5	5	5		wt dark vs. ko dark	0.8353	No		Number of values	5	5	5	5		wt dark vs. ko dark	0.9981	No			Number of values	5	5	5	5		wt dark vs. ko dark	0.9537	No		Number of values	5	5	5	5		wt dark vs. ko dark	>0.9999	No		Number of values	5	5	5	5		wt dark vs. ko dark	0.9098	No
Comparing light pulse conditions and genotype groups										Comparing light pulse conditions and genotype groups											Comparing light pulse conditions and genotype groups										Comparing light pulse conditions and genotype groups										Comparing light pulse conditions and genotype groups
ANOVA summary		Significant?								ANOVA summary		Significant?									ANOVA summary		Significant?								ANOVA summary		Significant?								ANOVA summary		Significant?
F	37.8									F	0.9123										F	1.051									F	1.204									F	0.3302
P value	<0.0001	Yes								P value	0.457	No									P value	0.3973	No								P value	0.3403	No								P value	0.8036	No
L4 C-FOS/Area		Descriptive statistics				Post-hoc analysis															L2-3 DAPI/Area		Descriptive statistics				Post-hoc analysis
	WT dark	WT light	KO dark	KO light		Šidák multiple comparison test	Adjusted P Value	Significant?														WT dark	WT light	KO dark	KO light		Šidák multiple comparison test	Adjusted P Value	Significant?
Mean	1512	2090	1424	1676		wt dark vs. wt light	0.0187	Yes													Mean	2879	3069	2911	2790		wt dark vs. wt light	0.8874	No
Std. Deviation	321	382.2	172.4	177.7		wt light vs. ko light	0.1223	No													Std. Deviation	253.7	474.6	193	451.2		wt light vs. ko light	0.6728	No
Std. Error of Mean	143.6	170.9	77.12	79.47		ko dark vs. ko light	0.5305	No													Std. Error of Mean	113.5	212.2	86.31	201.8		ko dark vs. ko light	0.9761	No
Number of values	5	5	5	5		wt dark vs. ko dark	0.9805	No													Number of values	5	5	5	5		wt dark vs. ko dark	0.9999	No
Comparing light pulse conditions and genotype groups																					Comparing light pulse conditions and genotype groups
ANOVA summary		Significant?																			ANOVA summary		Significant?
F	5.615																				F	0.5102
P value	0.008	Yes																			P value	0.6809	No
L5 C-FOS/Area		Descriptive statistics				Post-hoc analysis															L4 DAPI/Area		Descriptive statistics				Post-hoc analysis
	WT dark	WT light	KO dark	KO light		Šidák multiple comparison test	Adjusted P Value	Significant?														WT dark	WT light	KO dark	KO light		Šidák multiple comparison test	Adjusted P Value	Significant?
Mean	770.5	1180	657.8	924.5		wt dark vs. wt light	0.0698	No													Mean	3377	3801	3162	2916		wt dark vs. wt light	0.728	No
Std. Deviation	182	366.7	207	175.2		wt light vs. ko light	0.3988	No													Std. Deviation	724.6	634.1	426.7	564.3		wt light vs. ko light	0.1238	No
Std. Error of Mean	81.37	164	92.57	78.37		ko dark vs. ko light	0.3589	No													Std. Error of Mean	324	283.6	190.8	252.3		ko dark vs. ko light	0.9489	No
Number of values	5	5	5	5		wt dark vs. ko dark	0.9262	No													Number of values	5	5	5	5		wt dark vs. ko dark	0.9684	No
Comparing light pulse conditions and genotype groups																					Comparing light pulse conditions and genotype groups
ANOVA summary		Significant?																			ANOVA summary		Significant?
F	4.238																				F	1.972
P value	0.022	Yes																			P value	0.1589	No
L6 C-FOS/Area		Descriptive statistics				Post-hoc analysis															L5 DAPI/Area		Descriptive statistics				Post-hoc analysis
	WT dark	WT light	KO dark	KO light		Šidák multiple comparison test	Adjusted P Value	Significant?														WT dark	WT light	KO dark	KO light		Šidák multiple comparison test	Adjusted P Value	Significant?
Mean	1247	1654	1088	1313		wt dark vs. wt light	0.1214	No													Mean	2523	2201	2678	2414		wt dark vs. wt light	0.8426	No
Std. Deviation	294	377.6	214.9	155.8		wt light vs. ko light	0.2401	No													Std. Deviation	453.5	408	492.8	779.6		wt light vs. ko light	0.9587	No
Std. Error of Mean	131.5	168.9	96.1	69.65		ko dark vs. ko light	0.6159	No													Std. Error of Mean	202.8	182.4	220.4	348.7		ko dark vs. ko light	0.9165	No
Number of values	5	5	5	5		wt dark vs. ko dark	0.8455	No													Number of values	5	5	5	5		wt dark vs. ko dark	0.9873	No
Comparing light pulse conditions and genotype groups																					Comparing light pulse conditions and genotype groups
ANOVA summary		Significant?																			ANOVA summary		Significant?
F	3.794																				F	0.6578
P value	0.0314	Yes																			P value	0.5898	No
																					L6 DAPI/Area		Descriptive statistics				Post-hoc analysis
																						WT dark	WT light	KO dark	KO light		Šidák multiple comparison test	Adjusted P Value	Significant?
																					Mean	3724	3617	3444	3207		wt dark vs. wt light	0.9982	No
																					Std. Deviation	628.2	504.1	769	624.1		wt light vs. ko light	0.7921	No
																					Std. Error of Mean	281	225.4	343.9	279.1		ko dark vs. ko light	0.9642	No
																					Number of values	5	5	5	5		wt dark vs. ko dark	0.9367	No
																					Comparing light pulse conditions and genotype groups
																					ANOVA summary		Significant?
																					F	0.625
																					P value	0.6092	No

## Sheet: Figure 5
Related to	Figure 5
Fig. 5B Total response (average response)													Fig. 5D Percent responding mice (total response)													Fig. 5E Velocity during stimulus
Descriptive statistics													Values	N of mice				percentages								Descriptive statistics
	WT M			WT F			KO M			KO F				D1 respond	D1 not respond	D2 respond	D2 not respond	D1	D2								WT M		WT F		KO M		KO F
	D1	D2		D1	D2		D1	D2		D1	D2		WT M	11	0	10	1	100	90.9091								D1	D2	D1	D2	D1	D2	D1	D2
Median	1	0.4		0.8	0.4		0.2	0.2		0.3	0.2		WT F	11	0	8	3	100	72.7273							Mean	4.77	4.6	4.886	4.552	5.307	4.931	4.755	5.067
Minimum	0.3333	0		0.2	0		0	0		0	0		KO M	10	1	6	5	90.9091	54.5455							Std. Deviation	0.4087	0.6429	0.6259	0.88	0.6513	0.473	0.9407	0.9023
Maximum	1	1		1	0.8		0.5	0.6		0.5	0.4		KO F	8	2	8	2	80	80							Std. Error of Mean	0.1232	0.1938	0.1887	0.2653	0.1964	0.1426	0.2975	0.2853
Mean	0.8121	0.4545		0.7455	0.3		0.2318	0.1818		0.28	0.22															Number of values	11	11	11	11	11	11	10	10
Std. Deviation	0.2562	0.2841		0.2697	0.249		0.127	0.2089		0.1874	0.1476		Comparing genotypes within each sex group and testing day
Std. Error of Mean	0.07723	0.08567		0.08131	0.07508		0.0383	0.06298		0.05925	0.04667		Fisher's exact test													Comparing genotypes within each sex group and testing day
Number of values	11	11		11	11		11	11		10	10		M D1			M D2			F D1			F D2				Unpaired t-test summary
													P value	>0.9999		P value	0.1486		P value	0.2143		P value	>0.9999			M D1			M D2			F D1			F D2
Comparing genotypes within each sex group and testing day													Significant?	No		Significant?	No		Significant?	No		Significant?	No			t, df	t=2.316, df=20		t, df	t=1.375, df=20		t, df	t=0.3803, df=19		t, df	t=1.323, df=19
Mann Whitney test																										P value	0.0313		P value	0.1843		P value	0.7079		P value	0.2014
M D1			M D2			F D1			F D2				Comparing testing days within each sex and genotype group													Significant?	Yes		Significant?	No		Significant?	No		Significant?	No
Mann-Whitney U	3.5		Mann-Whitney U	26.5		Mann-Whitney U	10		Mann-Whitney U	44			Fisher's exact test
P value	<0.0001		P value	0.0227		P value	0.0006		P value	0.4631			WT M			WT F			KO M			KO F				Comparing testing days within each sex and genotype group
Significant?	Yes		Significant?	Yes		Significant?	Yes		Significant?	No			P value	>0.9999		P value	0.2143		P value	0.1486		P value	>0.9999			Unpaired t-test summary
													Significant?	No		Significant?	No		Significant?	No		Significant?	No			WT M			WT F			KO M			KO F
Comparing testing days within each sex and genotype group																										t, df	t=0.7384, df=20		t, df	t=1.027, df=20		t, df	t=1.548, df=20		t, df	t=0.7572, df=18
Mann Whitney test																										P value	0.4689		P value	0.3169		P value	0.1373		P value	0.4587
WT M			WT F			KO M			KO F																	Significant?	No		Significant?	No		Significant?	No		Significant?	No
Mann-Whitney U	23		Mann-Whitney U	14.5		Mann-Whitney U	46		Mann-Whitney U	39
P value	0.0108		P value	0.0012		P value	0.3434		P value	0.4381
Significant?	Yes		Significant?	Yes		Significant?	No		Significant?	No

## Sheet: Figure S5
Related to	Figure S5
Fig. S5A-C Different response types (average response)												Fig. S5D Frequency of different response types										Fig. S5E-G Percent responding mice (different response types)
Freeze																						Freeze
Descriptive statistics												Values										Values	N of mice				percentages
	WT M		WT F		KO M		KO F								Percentage of total responses								D1 respond	D1 not respond	D2 respond	D2 not respond	D1	D2
	D1	D2	D1	D2	D1	D2	D1	D2				Testing day	Sex	Genotype	Freeze	Escape	Freeze+Escape	No response				WT M	4	7	2	9	36.3636	18.1818
Median	0	0	0	0	0	0	0	0				d1	M	WT	7.69231	53.8462	21.1538	17.3077				WT F	3	8	2	9	27.2727	18.1818
Minimum	0	0	0	0	0	0	0	0				d2	M	WT	5.45455	34.5455	5.45455	54.5455				KO M	0	11	2	9	0	18.1818
Maximum	0.2	0.4	0.2	0.2	0	0.2	0.2	0.2				d1	F	WT	5.55556	44.4444	24.0741	25.9259				KO F	3	7	2	8	30	20
Mean	0.07273	0.05455	0.05455	0.03636	0	0.03636	0.06	0.04				d2	F	WT	3.77358	18.8679	7.54717	69.8113
Std. Deviation	0.1009	0.1293	0.09342	0.0809	0	0.0809	0.09661	0.08433														Comparing genotypes within each sex group and testing day
Std. Error of Mean	0.03042	0.039	0.02817	0.02439	0	0.02439	0.03055	0.02667				d1	M	KO	0	22.6415	0	77.3585				Fisher's exact test
Number of values	11	11	11	11	11	11	10	10				d2	M	KO	3.92157	15.6863	0	80.3922				M D1			M D2			F D1			F D2
												d1	F	KO	6.25	20.8333	0	72.9167				P value	0.09		P value	>0.9999		P value	>0.9999		P value	>0.9999
Comparing genotypes within each sex group and testing day												d2	F	KO	4	18	0	78				Significant?	No		Significant?	No		Significant?	No		Significant?	No
Mann Whitney test
M D1			M D2			F D1			F D2													Comparing testing days within each sex and genotype group
Mann-Whitney U	38.5		Mann-Whitney U	59.5		Mann-Whitney U	53.5		Mann-Whitney U	54												Fisher's exact test
P value	0.0902		P value	>0.9999		P value	>0.9999		P value	>0.9999												WT M			WT F			KO M			KO F
Significant?	No		Significant?	No		Significant?	No		Significant?	No												P value	0.6351		P value	>0.9999		P value	0.4762		P value	>0.9999
																						Significant?	No		Significant?	No		Significant?	No		Significant?	No
Comparing testing days within each sex and genotype group
Mann Whitney test
WT M			WT F			KO M			KO F													Escape
Mann-Whitney U	51.5		Mann-Whitney U	55		Mann-Whitney U	49.5		Mann-Whitney U	45												Values	N of mice				percentages
P value	0.6351		P value	>0.9999		P value	0.4762		P value	>0.9999													D1 respond	D1 not respond	D2 respond	D2 not respond	D1	D2
Significant?	No		Significant?	No		Significant?	No		Significant?	No												WT M	10	1	9	2	90.9091	81.8182
																						WT F	10	1	7	4	90.9091	63.6364
																						KO M	10	1	4	7	90.9091	36.3636
Escape																						KO F	7	3	6	4	70	60
Descriptive statistics
	WT M		WT F		KO M		KO F															Comparing genotypes within each sex group and testing day
	D1	D2	D1	D2	D1	D2	D1	D2														Fisher's exact test
Median	0.4	0.4	0.4	0.2	0.2	0	0.2	0.2														M D1			M D2			F D1			F D2
Minimum	0	0	0	0	0	0	0	0														P value	>0.9999		P value	0.0805		P value	0.3108		P value	>0.9999
Maximum	1	0.8	1	0.5	0.5	0.6	0.5	0.4														Significant?	No		Significant?	No		Significant?	No		Significant?	No
Mean	0.5348	0.3455	0.4545	0.1909	0.2318	0.1455	0.22	0.18
Std. Deviation	0.3236	0.2544	0.2697	0.1814	0.127	0.2207	0.1932	0.1751														Comparing testing days within each sex and genotype group
Std. Error of Mean	0.09756	0.07671	0.08131	0.0547	0.0383	0.06656	0.0611	0.05538														Fisher's exact test
Number of values	11	11	11	11	11	11	10	10														WT M			WT F			KO M			KO F
																						P value	>0.9999		P value	0.3108		P value	0.0237		P value	>0.9999
Comparing genotypes within each sex group and testing day																						Significant?	No		Significant?	No		Significant?	Yes		Significant?	No
Mann Whitney test
M D1			M D2			F D1			F D2
Mann-Whitney U	23.5		Mann-Whitney U	32.5		Mann-Whitney U	26		Mann-Whitney U	53												Freeze+Escape
P value	0.0102		P value	0.0594		P value	0.0397		P value	0.8857												Values	N of mice				percentages
Significant?	Yes		Significant?	No		Significant?	Yes		Significant?	No													D1 respond	D1 not respond	D2 respond	D2 not respond	D1	D2
																						WT M	8	3	3	8	72.7273	27.2727
Comparing testing days within each sex and genotype group																						WT F	7	4	2	9	63.6364	18.1818
Mann Whitney test																						KO M	0	11	0	11	0	0
WT M			WT F			KO M			KO F													KO F	0	10	0	10	0	0
Mann-Whitney U	40.5		Mann-Whitney U	25		Mann-Whitney U	38		Mann-Whitney U	38
P value	0.1941		P value	0.0168		P value	0.1362		P value	0.1362												Comparing genotypes within each sex group and testing day
Significant?	No		Significant?	Yes		Significant?	No		Significant?	No												Fisher's exact test
																						M D1			M D2			F D1			F D2
																						P value	0.001		P value	0.2143		P value	0.0039		P value	0.4762
Freeze+Escape																						Significant?	Yes		Significant?	No		Significant?	Yes		Significant?	No
Descriptive statistics
	WT M		WT F		KO M		KO F															Comparing testing days within each sex and genotype group
	D1	D2	D1	D2	D1	D2	D1	D2														Fisher's exact test
Median	0.2	0	0	0.8	0	0	0	0														WT M			WT F			KO M			KO F
Minimum	0	0	0	0.2	0	0	0	0														P value	0.0861		P value	0.0805		P value	>0.9999		P value	>0.9999
Maximum	0.6	0.2	0.6	1	0	0	0	0														Significant?	No		Significant?	No		Significant?	No		Significant?	No
Mean	0.2045	0.05455	0.07273	0.7455	0	0	0	0
Std. Deviation	0.1795	0.09342	0.1849	0.2697	0	0	0	0
Std. Error of Mean	0.05413	0.02817	0.05574	0.08131	0	0	0	0
Number of values	11	11	11	11	11	11	10	10
Comparing genotypes within each sex group and testing day
Mann Whitney test
M D1			M D2			F D1			F D2
Mann-Whitney U	16.5		Mann-Whitney U	44		Mann-Whitney U	20		Mann-Whitney U	45
P value	0.001		P value	0.2143		P value	0.0039		P value	0.4762
Significant?	Yes		Significant?	No		Significant?	Yes		Significant?	No
Comparing testing days within each sex and genotype group
Mann Whitney test
WT M			WT F			KO M			KO F
Mann-Whitney U	28.5		Mann-Whitney U	33.5		Mann-Whitney U	60.5		Mann-Whitney U	50
P value	0.0347		P value	0.0602		P value	>0.9999		P value	>0.9999
Significant?	Yes		Significant?	No		Significant?	No		Significant?	No

## Sheet: Figure 6 
Related to	Figure 6
Figure 6B-C
VC L1 astrocyte volume					VC L1 astrocyte area
Descriptive statistics					Descriptive statistics
	p16 wt	p16 ko				p16 wt	p16 ko
Mean	14980	9148			Mean	28004	22093
Std. Error of Mean	1270	1011			Std. Error of Mean	1187	1624
Number of values	5	5			Number of values	5	5
Comparing WT and KO					Comparing WT and KO
Unpaired t-test summary		Significant?			Unpaired t-test summary		Significant?
P value	0.0071	Yes			P value	0.0187	Yes

[truncated: 1 more sheets: Figure S6]
